# Supplementary material for: A luminescent linear trinuclear magnesium complex assembled from a phosphorus-based tris-hydrazone ligand
Source: Royal Society of Chemistry journal article supplement (doi:10.1039/b414353a), 2004-12-06

## Supplementary Information

# **A Luminescent Linear Trinuclear Magnesium Complex Assembled from a Phosphorus-based *tris* Hydrazone Ligand**

Vadapalli Chandrasekhar,<sup>\*a</sup> Ramachandran Azhakar,<sup>a</sup> Jamie F. Bickley<sup>b</sup> and Alexander Steiner<sup>b</sup>

<sup>a</sup> Department of Chemistry, Indian Institute of Technology, Kanpur, Kanpur-208016, India. Fax: 91 512 2590007/2597436; Tel: 91 512 2597259; E-mail: vc@iitk.ac.in

<sup>b</sup> Department of Chemistry, University of Liverpool, Liverpool-L69 7ZD, U.K.

### **Synthesis of LH<sub>3</sub>:**

The ligand LH<sub>3</sub> was synthesized as reported in the literature. (*Inorg. Chem.*, 2003, **42**, 5989)

### **Synthesis of L<sub>2</sub>Mg<sub>3</sub> complex:**

To a solution of the ligand LH<sub>3</sub> (0.6 mmol) and triethylamine (6 mmol) in chloroform (30 mL) was added drop-wise a solution of the MgCl<sub>2</sub>.6H<sub>2</sub>O (0.9 mmol) in methanol (30 mL) at room temperature and stirred for 6h. The metal complex precipitated out of the reaction mixture and was filtered. This was dissolved in a minimum amount of dichloromethane (5 mL) and *n*-hexane was added to it until a slight turbidity appeared. This was kept at 5 °C to obtain a crystalline product.

Yield: 0.25g, 78.0%. Mp: >280 °C. UV-vis.(CH<sub>2</sub>Cl<sub>2</sub>) λ<sub>max</sub>/nm (ε/ Lmol<sup>-1</sup>cm<sup>-1</sup>): 354 (18588), 286 (52215), 278 (51540). FT-IR (KBr) ν<sub>C=N</sub>/cm<sup>-1</sup>: 1601cm<sup>-1</sup>. <sup>1</sup>H NMR: 3.28(d, 9H, -N(CH<sub>3</sub>); <sup>3</sup>J(<sup>1</sup>H-<sup>31</sup>P) =11.0Hz), 6.19-6.23(m, 3H, aromatic), 6.37-6.42(m, 3H, aromatic), 6.60-6.62(m, 3H, aromatic), 6.87-6.89(m, 3H, aromatic), 8.18(s, 3H, imino). <sup>13</sup>C NMR: 37.2 (N-CH<sub>3</sub>), 114.9, 117.3, 122.6, 133.6, 163.9 (aromatic carbons), 165.7

# Supplementary Material (ESI) for Chemical Communications

# This journal is © The Royal Society of Chemistry 2004

(N=CH).  $^{31}\text{P}$  NMR: 69.1(s). FAB-MS: 1088( $\text{M}^+$ ). Anal. Calcd for

$\text{C}_{48}\text{H}_{48}\text{N}_{12}\text{O}_6\text{P}_2\text{S}_2\text{Mg}_3$ : C,53.00; H,4.45; N,15.45. Found: C,52.50; H,4.55; N,15.10.

**Table 1.**

Crystal and structure Refinement Data for  $\text{L}_2\text{Mg}_3$  complex:

| Parameters                           | $\text{L}_2\text{Mg}_3$                                                                                                                                                      |
|--------------------------------------|------------------------------------------------------------------------------------------------------------------------------------------------------------------------------|
| Empirical formula                    | $\text{C}_{51}\text{H}_{51}\text{Cl}_9\text{Mg}_3\text{N}_{12}\text{O}_6\text{P}_2\text{S}_2$                                                                                |
| Formula Weight                       | 1446.08                                                                                                                                                                      |
| Temperature                          | 213 (2) K                                                                                                                                                                    |
| Wavelength                           | 0.71073 Å                                                                                                                                                                    |
| Crystal system                       | Triclinic                                                                                                                                                                    |
| Space group                          | P-1                                                                                                                                                                          |
| Unit cell dimensions                 | $a = 11.065 (3) \text{ \AA}$ $\alpha = 72.67 (3)^\circ$<br>$b = 11.168 (3) \text{ \AA}$ $\beta = 83.03 (3)^\circ$<br>$c = 15.436 (3) \text{ \AA}$ $\gamma = 61.40 (2)^\circ$ |
| Volume, Z                            | $1598.3 (6) \text{ \AA}^3, 1$                                                                                                                                                |
| Density (Calculated)                 | $1.502 \text{ Mg/m}^3$                                                                                                                                                       |
| Absorption coefficient               | $0.596 \text{ mm}^{-1}$                                                                                                                                                      |
| F (000)                              | 740                                                                                                                                                                          |
| Crystal size                         | $0.5 \times 0.5 \times 0.5 \text{ mm}^3$                                                                                                                                     |
| $\theta$ range for data collection   | $2.10$ to $24.25^\circ$                                                                                                                                                      |
| Limiting indices                     | $-12 \leq h \leq 12, -12 \leq k \leq 12, -17 \leq l \leq 17$                                                                                                                 |
| Reflections collected                | 10130                                                                                                                                                                        |
| Independent reflections              | 4733 ( $R_{\text{int}} = 0.0374$ )                                                                                                                                           |
| Completeness to $\theta$             | 91.8%                                                                                                                                                                        |
| Refinement method                    | Full - matrix least - squares on $F^2$                                                                                                                                       |
| Data/ restraints/ parameters         | 4733 / 27 / 406                                                                                                                                                              |
| Goodness - of - fit on $F^2$         | 1.083                                                                                                                                                                        |
| Final R indices [ $I > 2\sigma(I)$ ] | $R1 = 0.0532, wR2 = 0.1457$                                                                                                                                                  |
| R indices (all data)                 | $R1 = 0.0628, wR2 = 0.1532$                                                                                                                                                  |
| Largest diff. peak and hole          | $1.019$ and $-0.619 \text{ e\AA}^{-3}$                                                                                                                                       |

**Ortep Diagram of L<sub>2</sub>Mg<sub>3</sub>:**

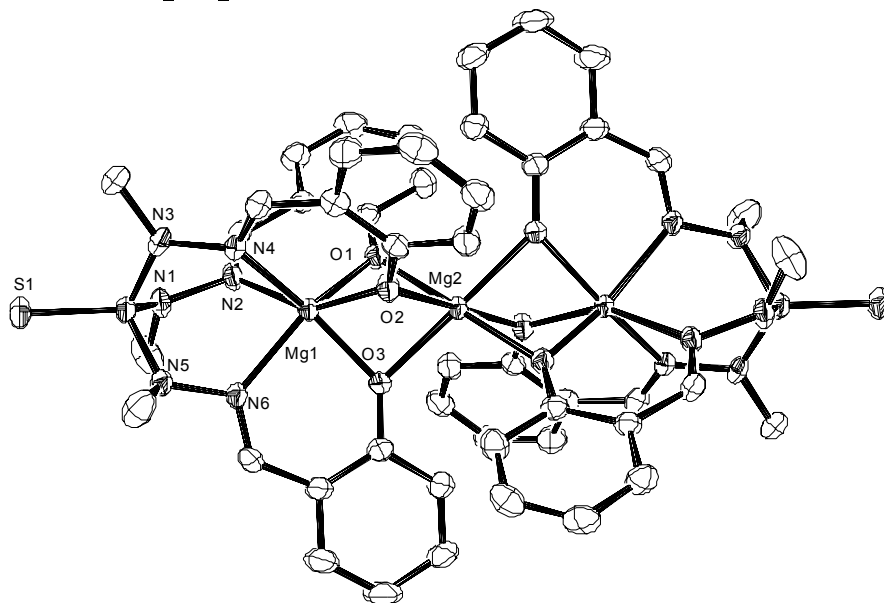

**Table 2.**

**Important bond length (Å) and bond angles (°) for L<sub>2</sub>Mg<sub>3</sub> complex:**

**(a) bond length in Å**

|             |            |
|-------------|------------|
| Mg(1)-O(2)  | 2.009(3)   |
| Mg(1)-O(3)  | 2.039(3)   |
| Mg(1)-O(1)  | 2.051(3)   |
| Mg(1)-N(2)  | 2.145(3)   |
| Mg(1)-N(6)  | 2.167(3)   |
| Mg(1)-N(4)  | 2.249(3)   |
| Mg(2)-O(1)  | 2.070(2)   |
| Mg(2)-O(3)  | 2.091(2)   |
| Mg(2)-O(2)  | 2.097(2)   |
| Mg(1)-Mg(2) | 2.7828(13) |

**(b) bond angles in °**

|                 |            |
|-----------------|------------|
| O(2)-Mg(1)-O(3) | 81.00(10)  |
| O(2)-Mg(1)-O(1) | 81.11(10)  |
| O(3)-Mg(1)-O(1) | 79.67(10)  |
| O(2)-Mg(1)-N(2) | 150.37(12) |
| O(3)-Mg(1)-N(2) | 119.50(12) |
| O(1)-Mg(1)-N(2) | 82.04(11)  |
| O(2)-Mg(1)-N(6) | 118.11(11) |
| O(3)-Mg(1)-N(6) | 83.80(11)  |
| O(1)-Mg(1)-N(6) | 152.29(12) |
| N(2)-Mg(1)-N(6) | 87.03(12)  |

# Supplementary Material (ESI) for Chemical Communications  
# This journal is © The Royal Society of Chemistry 2004

|                     |            |
|---------------------|------------|
| O(2)-Mg(1)-N(4)     | 84.07(11)  |
| O(3)-Mg(1)-N(4)     | 155.40(11) |
| O(1)-Mg(1)-N(4)     | 117.20(11) |
| N(2)-Mg(1)-N(4)     | 82.21(11)  |
| N(6)-Mg(1)-N(4)     | 86.16(11)  |
| O(2)-Mg(1)-Mg(2)    | 48.68(7)   |
| O(3)-Mg(1)-Mg(2)    | 48.45(7)   |
| O(1)-Mg(1)-Mg(2)    | 47.82(7)   |
| N(2)-Mg(1)-Mg(2)    | 127.75(9)  |
| N(6)-Mg(1)-Mg(2)    | 129.17(8)  |
| N(4)-Mg(1)-Mg(2)    | 128.87(9)  |
| O(1)#1-Mg(2)-O(1)   | 180.0      |
| O(1)#1-Mg(2)-O(3)   | 101.98(9)  |
| O(1)-Mg(2)-O(3)     | 78.02(9)   |
| O(1)#1-Mg(2)-O(3)#1 | 78.02(9)   |
| O(1)-Mg(2)-O(3)#1   | 101.98(9)  |
| O(3)-Mg(2)-O(3)#1   | 180.000(1) |
| O(1)#1-Mg(2)-O(2)   | 101.39(9)  |
| O(1)-Mg(2)-O(2)     | 78.61(9)   |
| O(3)-Mg(2)-O(2)     | 77.77(9)   |
| O(3)#1-Mg(2)-O(2)   | 102.23(9)  |
| O(1)#1-Mg(2)-O(2)#1 | 78.61(9)   |
| O(1)-Mg(2)-O(2)#1   | 101.39(9)  |
| O(3)-Mg(2)-O(2)#1   | 102.23(9)  |
| O(3)#1-Mg(2)-O(2)#1 | 77.77(9)   |
| O(2)-Mg(2)-O(2)#1   | 180.000(1) |
| Mg(1)-Mg(2)-Mg(1)#1 | 180.0      |

**Weak intermolecular  $\pi$ - $\pi$  interactions of  $L_2Mg_3$  complex in the solid state structure:**

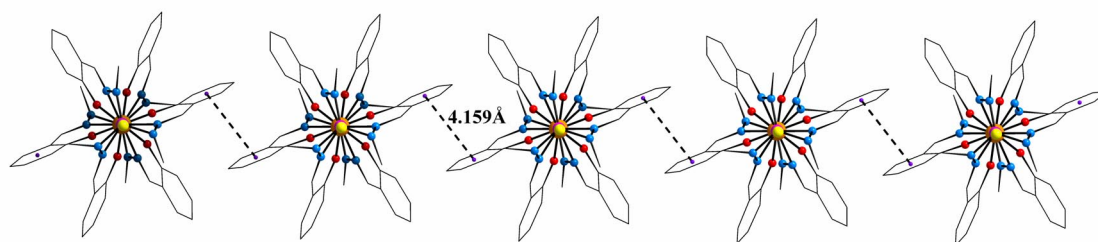

View of the supramolecular array along the inter-metal axis where the centroid-centroid distance of 4.159 Å, shortest C-C distance of 3.313 Å and shortest C-centroid distance of 3.497 Å

# Supplementary Material (ESI) for Chemical Communications  
# This journal is © The Royal Society of Chemistry 2004

**UV-vis spectrum of  $L_2Mg_3$  complex ( $CH_2Cl_2$ ):**

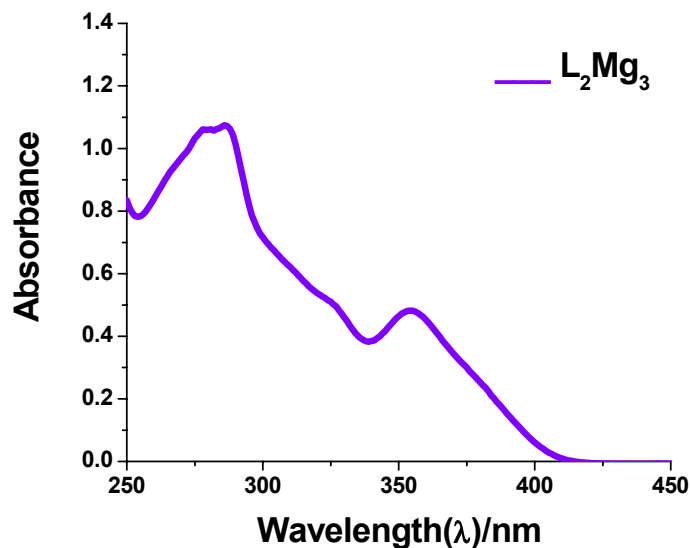

**Excitation spectrum of  $L_2Mg_3$  complex recorded at different wavelength:**

Excitation spectrum of  $L_2Mg_3$  complex in  $CH_2Cl_2$  solution recorded at four different wavelengths. The spectrum obtained at four different wavelength are represented in four different colors.

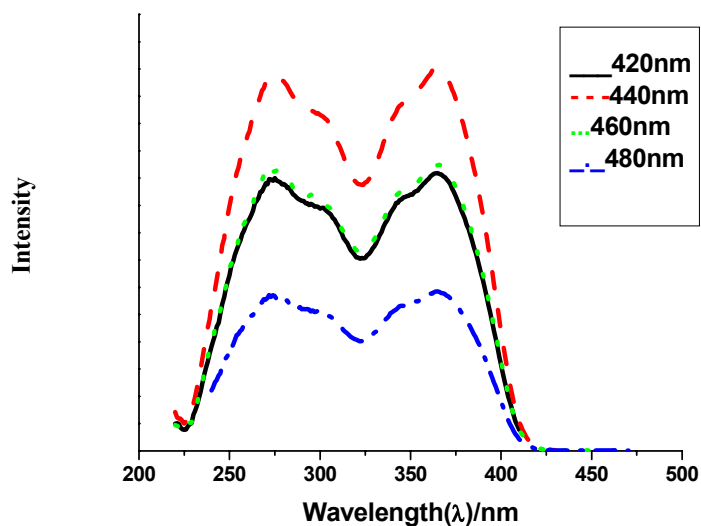

# Supplementary Material (ESI) for Chemical Communications  
# This journal is © The Royal Society of Chemistry 2004

**TGA curve of L<sub>2</sub>Mg<sub>3</sub> complex:**

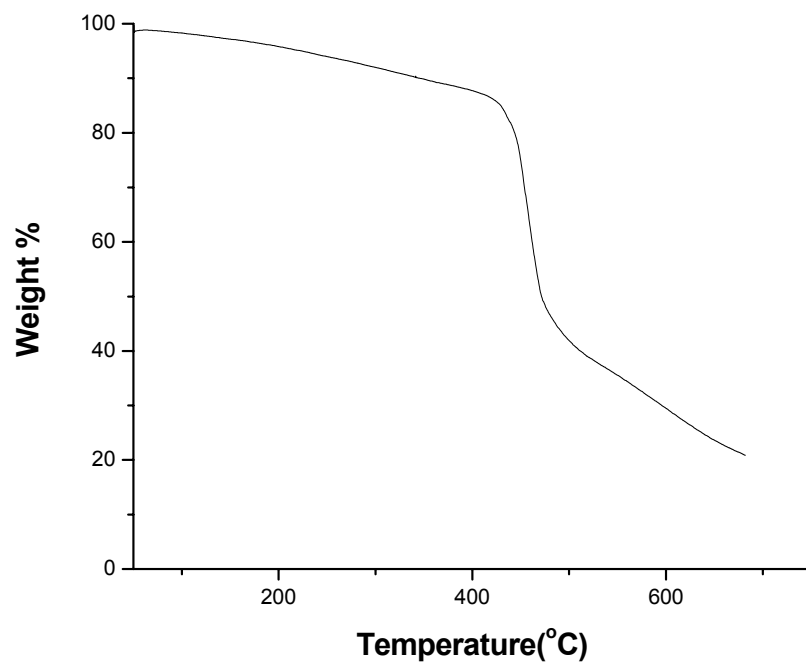

Supplement: b414353a.pdf [file b414353a.pdf]
